# Supplementary material for: A prognostic index predicting survival in transformed Waldenström macroglobulinemia
Source: PubMed Central journal article supplement — Haematologica. 2020 Nov 12;106(11):2940–6. doi: 10.3324/haematol.2020.262899 (PMC8561274; doi:10.3324/haematol.2020.262899), 2020-11-12

## A prognostic index predicting survival in transformed Waldenström macroglobulinemia

Eric Durot,<sup>1</sup> Lukshe Kanagaratnam,<sup>2</sup> Saurabh Zanwar,<sup>3</sup> Efstathios Kastritis,<sup>4</sup> Shirley D'Sa,<sup>5</sup> Ramon Garcia-Sanz,<sup>6</sup> Cécile Tomowiak,<sup>7</sup> Bénédicte Hivert,<sup>8</sup> Elise Toussaint,<sup>9</sup> Caroline Protin,<sup>10</sup> Jithma P. Abeykoon,<sup>3</sup> Thomas Guerrero-Garcia,<sup>11</sup> Gilad Itchaki,<sup>12</sup> Josephine M. Vos,<sup>13</sup> Anne-Sophie Michallet,<sup>14</sup> Sophie Godet,<sup>1</sup> Jehan Dupuis,<sup>15</sup> Stéphane Leprêtre,<sup>16</sup> Joshua Bomsztyk,<sup>5</sup> Pierre Morel,<sup>17</sup> Véronique Leblond,<sup>18</sup> Steven P. Treon,<sup>19</sup> Meletios A. Dimopoulos,<sup>4</sup> Prashant Kapoor,<sup>3</sup> Alain Delmer<sup>1#</sup> and Jorge J. Castillo<sup>19#</sup>

<sup>1</sup>Department of Hematology, University Hospital of Reims and UFR Médecine, Reims, France; <sup>2</sup>Department of Research and Innovation, University Hospital of Reims, Reims, France; <sup>3</sup>Division of Hematology, Department of Internal Medicine, Mayo Clinic, Rochester, MN, USA; <sup>4</sup>Department of Clinical Therapeutics, National and Kapodistrian University of Athens, Athens, Greece; <sup>5</sup>University College London Hospitals (UCLH) NHS Foundation Trust, London, UK; <sup>6</sup>Department of Hematology, University Hospital of Salamanca, CIBERONC and Research Biomedical Institute of Salamanca (IBSAL), Salamanca, Spain; <sup>7</sup>Department of Hematology and CIC U1402, University Hospital of Poitiers, Poitiers, France; <sup>8</sup>Department of Hematology, Hospital of Lens, Lens, France; <sup>9</sup>Department of Hematology, University Hospital of Strasbourg, Strasbourg, France; <sup>10</sup>Department of Hematology, IUCT Oncopole, Toulouse, France; <sup>11</sup>Department of Hematology/Oncology, Delbert Day Cancer Institute, Rolla, MO, USA; <sup>12</sup>Institute of Hematology, Rabin Medical Center, Sackler Medical School, Tel-Aviv University, Tel-Aviv, Israel; <sup>13</sup>Amsterdam University Medical Center (UMC) and LYMMCARE, Amsterdam, the Netherlands; <sup>14</sup>Department of Hematology, Léon Bérard Center, Lyon, France; <sup>15</sup>Lymphoid Malignancies Unit, Henri Mondor Hospital, Créteil, France; <sup>16</sup>Inserm U1245 and Department of Hematology, Henri Becquerel Center and Normandie University UNIROUEN, Rouen, France; <sup>17</sup>Department of Hematology, University Hospital of Amiens, Amiens, France; <sup>18</sup>Department of Hematology, Pitié-Salpêtrière Hospital and Sorbonne University, UPMC Paris, GRECHY, France and <sup>19</sup>Bing Center for Waldenström Macroglobulinemia, Dana-Farber Cancer Institute, Harvard Medical School, Boston, MA, USA

<sup>#</sup>AD and JJC contributed equally as co-senior authors.

©2021 Ferrata Storti Foundation. This is an open-access paper. doi:10.3324/haematol.2020.262899

Received: June 10, 2020.

Accepted: October 23, 2020.

Pre-published: November 12, 2020.

Correspondence: ERIC DUROT - edurot@chu-reims.fr

# Supplementary Appendix

Supplement to: Durot E, Kanagaratnam L, Zanwar S et al. A prognostic index predicting survival in transformed Waldenström macroglobulinemia.

## Table of Contents

|                              |    |
|------------------------------|----|
| Supplementary Methods .....  | 2  |
| Supplementary Table 1.....   | 4  |
| Supplementary Figure 1 ..... | 5  |
| Supplementary Figure 2.....  | 6  |
| Supplementary Figure 3 ..... | 7  |
| Supplementary Table 2 .....  | 8  |
| Supplementary Table 3 .....  | 9  |
| Supplementary Figure 4 ..... | 10 |

## **Supplementary Methods**

### ***Patients and data collection for development of the prognostic model***

Fifteen variables were considered as covariates for model building. These covariates were: sex, number of lines of treatment for WM, rituximab exposure for the treatment of WM, time to transformation, and at time of HT: age, Eastern Cooperative Oncology Group (ECOG) performance status (PS, 0-4), presence of B symptoms (defined as recurrent fever, nights sweats, or > 10% weight loss), extranodal involvement, Ann Arbor stage (I-IV), leucocytes, hemoglobin and platelets counts, and serum albumin, LDH and  $\beta$ 2-microglobulin levels. Extranodal involvement at HT was confirmed by the site of biopsy.

### ***Training and validation cohorts***

The training and the validation cohorts were formed consecutively. After development of the prognostic model and the scoring system, other centers were contacted to provide data from patients with transformed WM so that the validation cohort was independent. The inclusion criteria for the validation set were similar to those for the training set.

### ***End point***

Given the reported poor survival after HT in transformed WM ranging from 1.5 to 3 years<sup>1-3</sup> and the fact that the majority of events, mainly deaths, occur in the first 2 years following the diagnosis of DLBCL<sup>4</sup>, 2-year survival after HT was chosen as the main end point for statistical analyses.

### ***Statistical methods***

Descriptive statistics included all clinical and demographic characteristics. Continuous variables were expressed as median and range and categorical variables as number and percentages.

Log-linearity and the proportional hazards assumptions were checked. When the log-linearity assumption was not verified, continuous variables were converted into categorical form according to thresholds used in clinical practice or literature data determined before analyzes.

The C-index estimates the proportion of all pairs of patients in whom prediction and outcome are concordant and takes values from 0.5 (no discrimination) to 1.0 (perfect discrimination). The Harrell's C-index and the May and Hosmer test for goodness-of-fit were used to assess discrimination and calibration in the validation cohort, as was done in the training cohort.

## **References**

<sup>1</sup>Castillo JJ, Gustine J, Meid K, et al. Histological transformation to diffuse large B-cell lymphoma in patients with Waldenström macroglobulinemia. *Am J Hematol.* 2016; 91(10):1032-1035.

<sup>2</sup>Durot E, Tomowiak C, Michallet AS, et al. Transformed Waldenström macroglobulinaemia: clinical presentation and outcome. A multi-institutional retrospective study of 77 cases of the French Innovative Leukemia Organization (FILO). *Br J Haematol.* 2017;179(3):439-448.

<sup>3</sup>Zanwar S, Abeykoon JP, Durot E, et al. Impact of MYD88 L265P mutation status on histological transformation of Waldenström Macroglobulinemia. *Am J Hematol.* 2020;95(3):274-281.

<sup>4</sup>Maurer MJ, Ghesquières H, Jais JP, et al. Event-free survival at 24 months is a robust end point for disease-related outcome in diffuse large B-cell lymphoma treated with immunochemotherapy. *J Clin Oncol.* 2014;32(10):1066-1073.

**Supplementary Table 1. Accrual of patients**

| <b>Center</b>                                                 | <b>Training set<br/>(n = 133)</b> | <b>Validation set<br/>(n = 67)</b> |
|---------------------------------------------------------------|-----------------------------------|------------------------------------|
| <b>FILO centers (France and Belgium)</b>                      | <b>80</b>                         | <b>8</b>                           |
| Lens                                                          | 10                                |                                    |
| Pitié Salpêtrière, Paris                                      | 9                                 |                                    |
| Poitiers                                                      | 8                                 |                                    |
| Toulouse                                                      |                                   | 8                                  |
| Lyon (Léon Bérard)                                            | 7                                 |                                    |
| Strasbourg                                                    | 7                                 |                                    |
| Henri Mondor, Créteil                                         | 5                                 |                                    |
| Reims                                                         | 5                                 |                                    |
| Rouen                                                         | 5                                 |                                    |
| Amiens                                                        | 3                                 |                                    |
| Besançon                                                      | 3                                 |                                    |
| Bruxelles                                                     | 3                                 |                                    |
| Versailles                                                    | 3                                 |                                    |
| Clermont-Ferrand                                              | 2                                 |                                    |
| Cochin, Paris                                                 | 2                                 |                                    |
| Grenoble                                                      | 2                                 |                                    |
| Saint-Louis, Paris                                            | 2                                 |                                    |
| Argenteuil                                                    | 2                                 |                                    |
| Le Mans                                                       | 1                                 |                                    |
| Nancy                                                         | 1                                 |                                    |
| <b>Dana Farber Cancer Institute, Boston, MA, USA</b>          | <b>36</b>                         |                                    |
| <b>University College London Hospitals, London, UK</b>        | <b>13</b>                         |                                    |
| <b>Nieuwegein, The Netherlands</b>                            | <b>4</b>                          |                                    |
| <b>Mayo Clinic, Rochester, MN, USA</b>                        |                                   | <b>27</b>                          |
| <b>University Hospital and IBSAL, Salamanca, Spain</b>        |                                   | <b>15</b>                          |
| <b>National and Kapodistrian University of Athens, Greece</b> |                                   | <b>14</b>                          |
| <b>Academical Medical Center, Amsterdam, The Netherlands</b>  |                                   | <b>3</b>                           |

**Supplementary Figure 1. Kaplan-Meier curves of survival after transformation.** The median OS after HT was 19 months (95% CI 12-31 months) in the training cohort (A) and 18 months (95% CI 13-NR months) in the validation cohort (B).

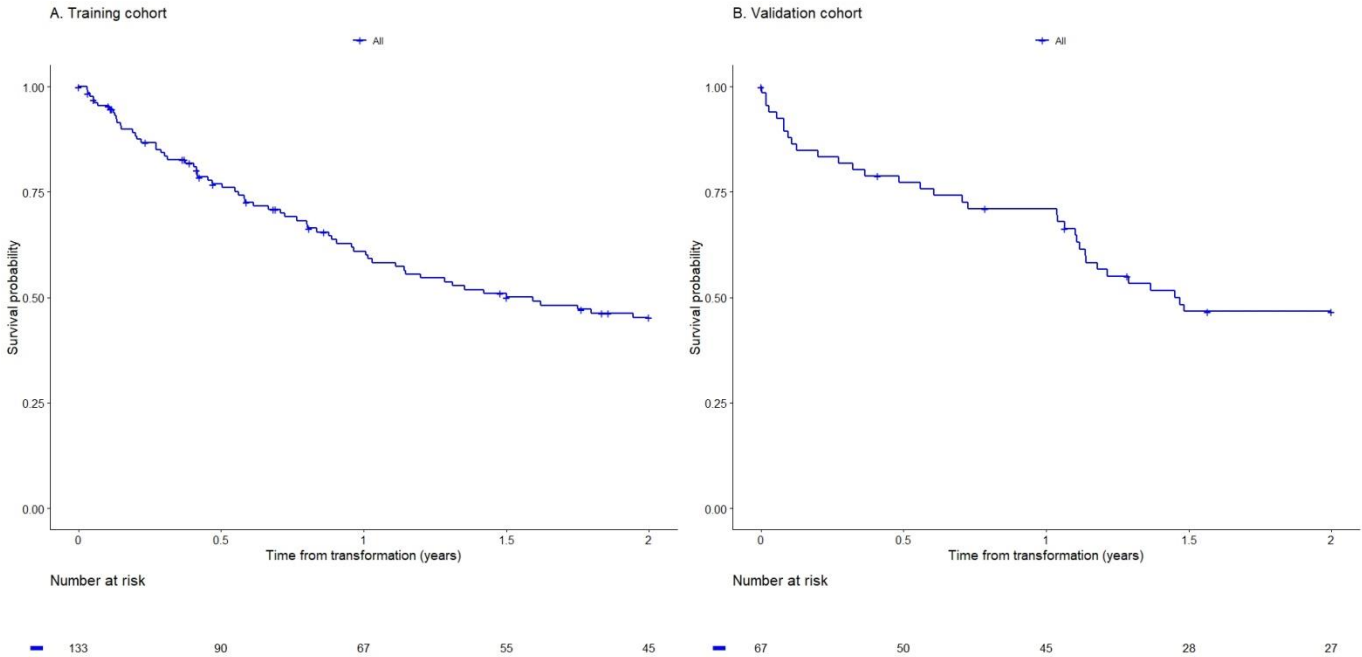

**Supplementary Figure 2. Kaplan-Meier curves of survival after transformation stratified by (A) previous treatment for WM, (B) LDH level at transformation, and (C) platelet count at transformation.**

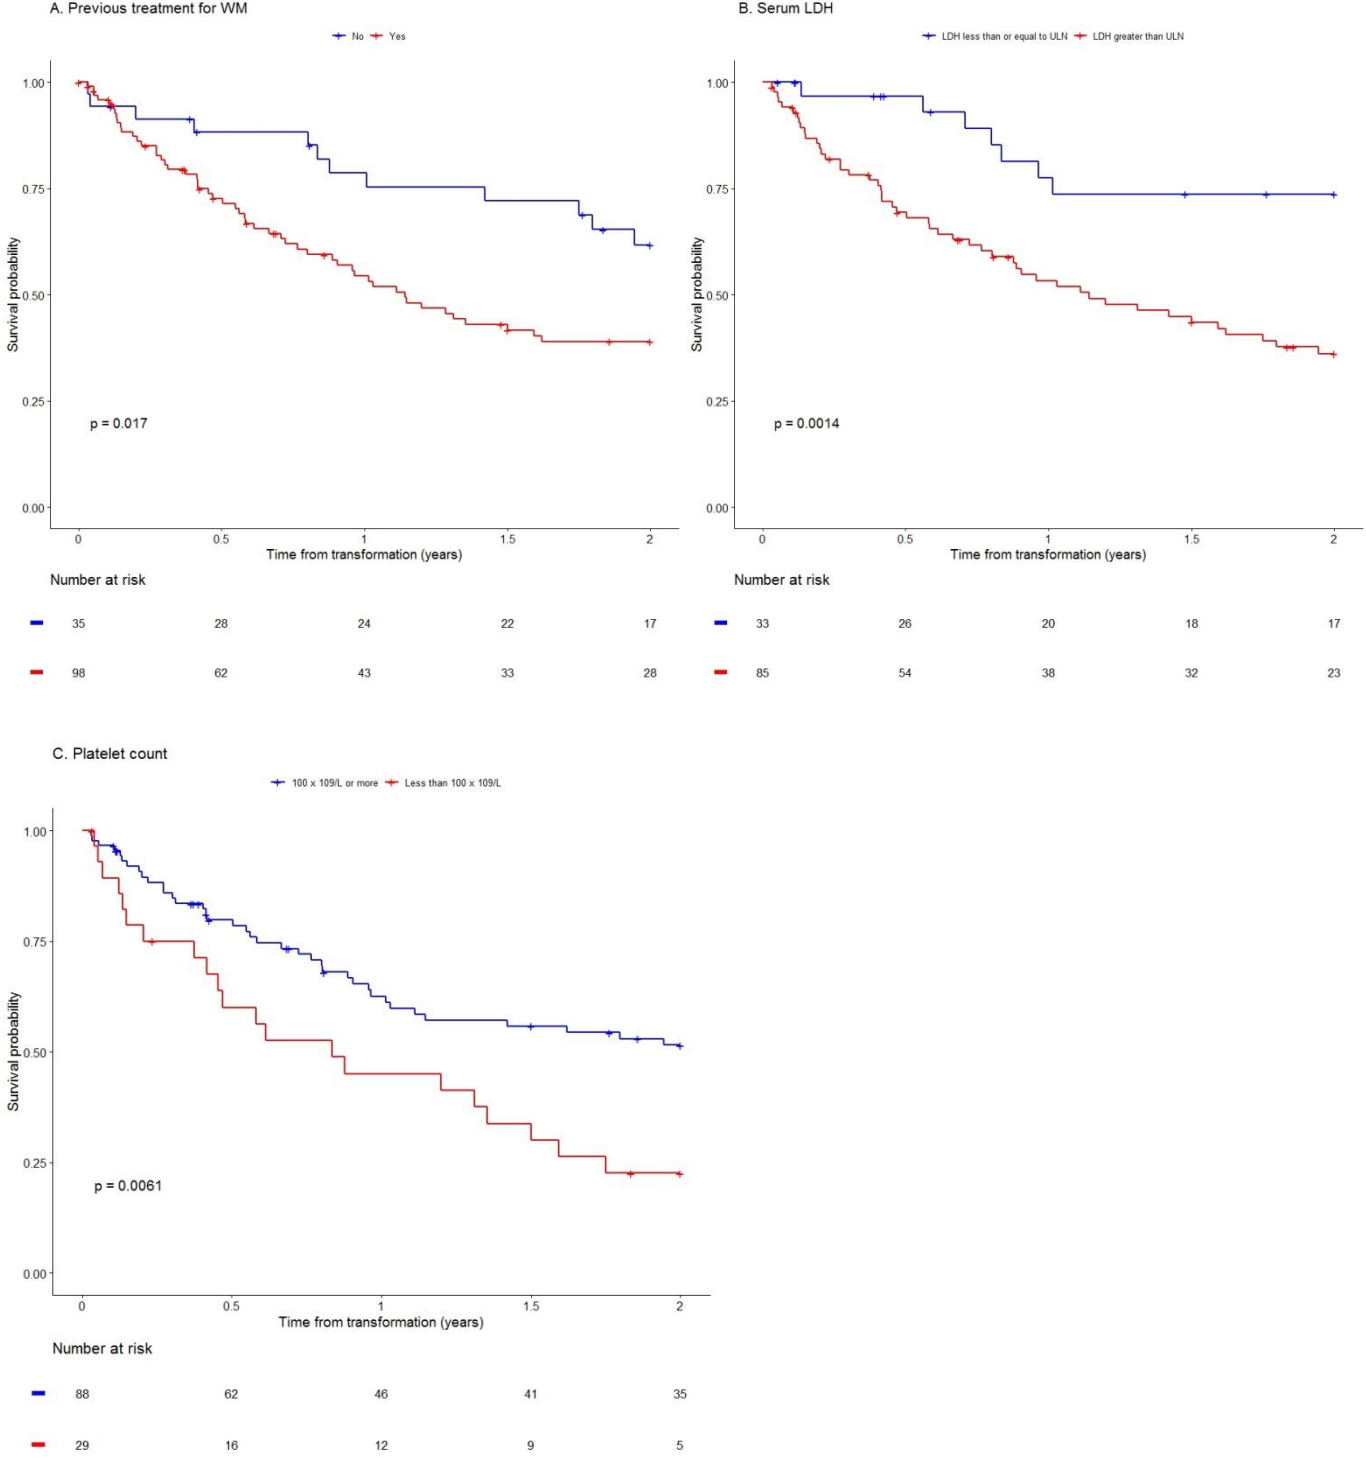

**Supplementary Figure 3. Kaplan-Meier curves of survival after transformation according to subgroups defined by the tWIPI after exclusion of patients with concurrent disease. (A) Training cohort. (B) Validation cohort.**

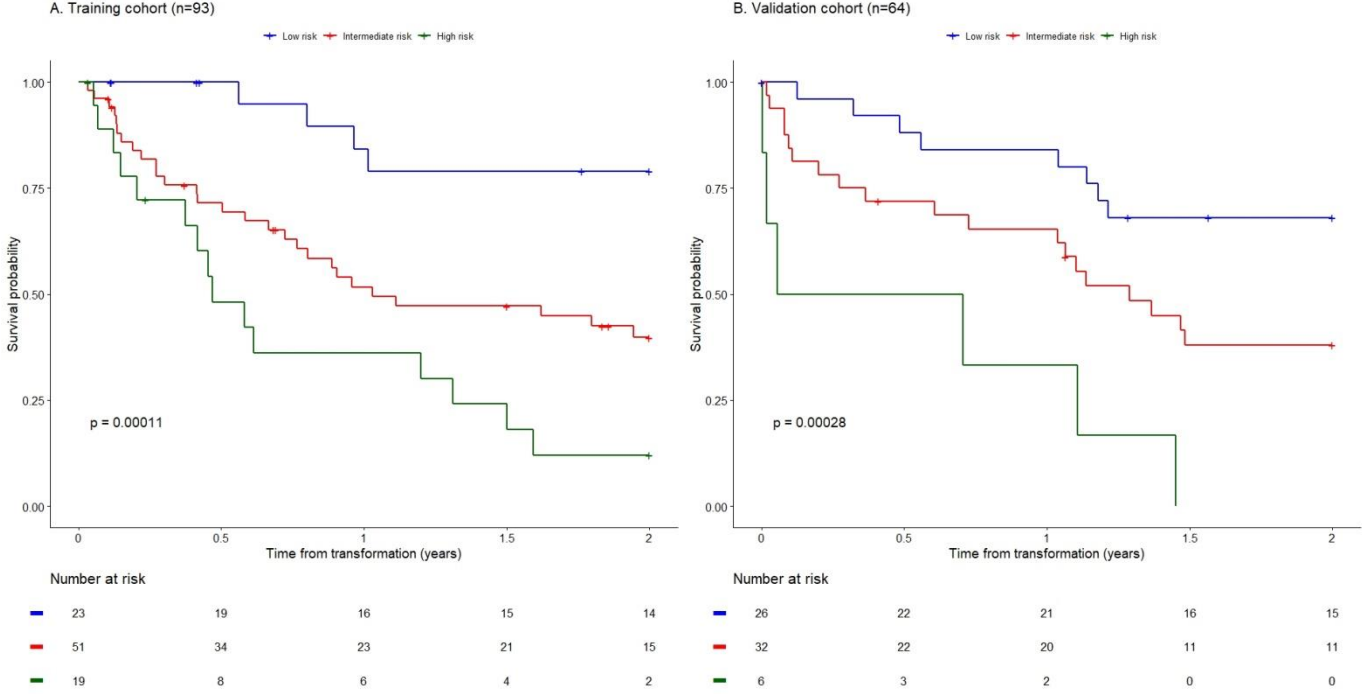



**Supplementary Table 2. The transformed Waldenström International Prognostic Index: outcome and relative risk of death according to risk group after exclusion of patients with concurrent disease. (A) Training cohort. (B) Validation cohort.**

**(A) Training cohort (n = 93)**

| <b>Risk group</b> | <b>Score</b> | <b>No. of patients (%)</b> | <b>Median survival, months</b> | <b>HR</b> | <b>95% CI</b> |
|-------------------|--------------|----------------------------|--------------------------------|-----------|---------------|
| Low               | 0-1          | 23 (25)                    | NR                             | 1.0       | NA            |
| Intermediate      | 2-3          | 51 (55)                    | 12.3                           | 4.2       | 1.5-11.9      |
| High              | 4            | 19 (20)                    | 5.6                            | 8.4       | 2.8-25.5      |

*HR, hazard ratio; CI, confidence interval; NR, not reached; NA, not applicable*

Harrell's C-index: 0.75 (95% CI = [0.65-0.85])

The May and Hosmer goodness-of-fit test: P value > 0.8 for each stratum

**(B) Validation cohort (n = 64)**

| <b>Risk group</b> | <b>Score</b> | <b>No. of patients (%)</b> | <b>Median survival, months</b> | <b>HR</b> | <b>95% CI</b> |
|-------------------|--------------|----------------------------|--------------------------------|-----------|---------------|
| Low               | 0-1          | 26 (41)                    | NR                             | 1.0       | NA            |
| Intermediate      | 2-3          | 32 (50)                    | 15.5                           | 2.5       | 1.1-5.6       |
| High              | 4            | 6 (9)                      | 4.6                            | 7.5       | 2.6-22.0      |

*HR, hazard ratio; CI, confidence interval; NR, not reached; NA, not applicable*

Harrell's C-index: 0.81 (95% CI = [0.65-0.93])

The May and Hosmer goodness-of-fit test: P value > 0.4 for each stratum

**Supplementary Table 3. Outcome according to risk group as defined by the IPI and R-IPI in 99 patients with data available for tWIPI and IPI**

| <b>Risk group</b>   | <b>Number of IPI factors</b> | <b>Distribution of patients, %</b> | <b>2-year OS, %</b> | <b>HR</b> | <b>95% CI</b> |
|---------------------|------------------------------|------------------------------------|---------------------|-----------|---------------|
| <b>Standard IPI</b> |                              |                                    |                     |           |               |
| Low risk            | 0-1                          | 8                                  | 75                  | 1.0       | NA            |
| Low-intermediate    | 2                            | 17                                 | 52.9                | 2.5       | 0.5-11.7      |
| High-intermediate   | 3                            | 33                                 | 39.4                | 3.3       | 0.8-13.9      |
| High                | 4-5                          | 41                                 | 46.3                | 3.4       | 0.8-14.3      |
| <b>Revised IPI</b>  |                              |                                    |                     |           |               |
| Very good           | 0                            | 1                                  | 100                 | NA        | NA            |
| Good                | 1-2                          | 24                                 | 58.3                | NA        | NA            |
| Poor                | 3-4-5                        | 74                                 | 43.2                | NA        | NA            |

*IPI, International Prognostic Index; OS, overall survival; HR, hazard ratio; CI, confidence interval; NA, not applicable.*

**Supplementary Figure 4. Kaplan-Meier curve of survival after transformation according to MYD88 L265P mutation status.**

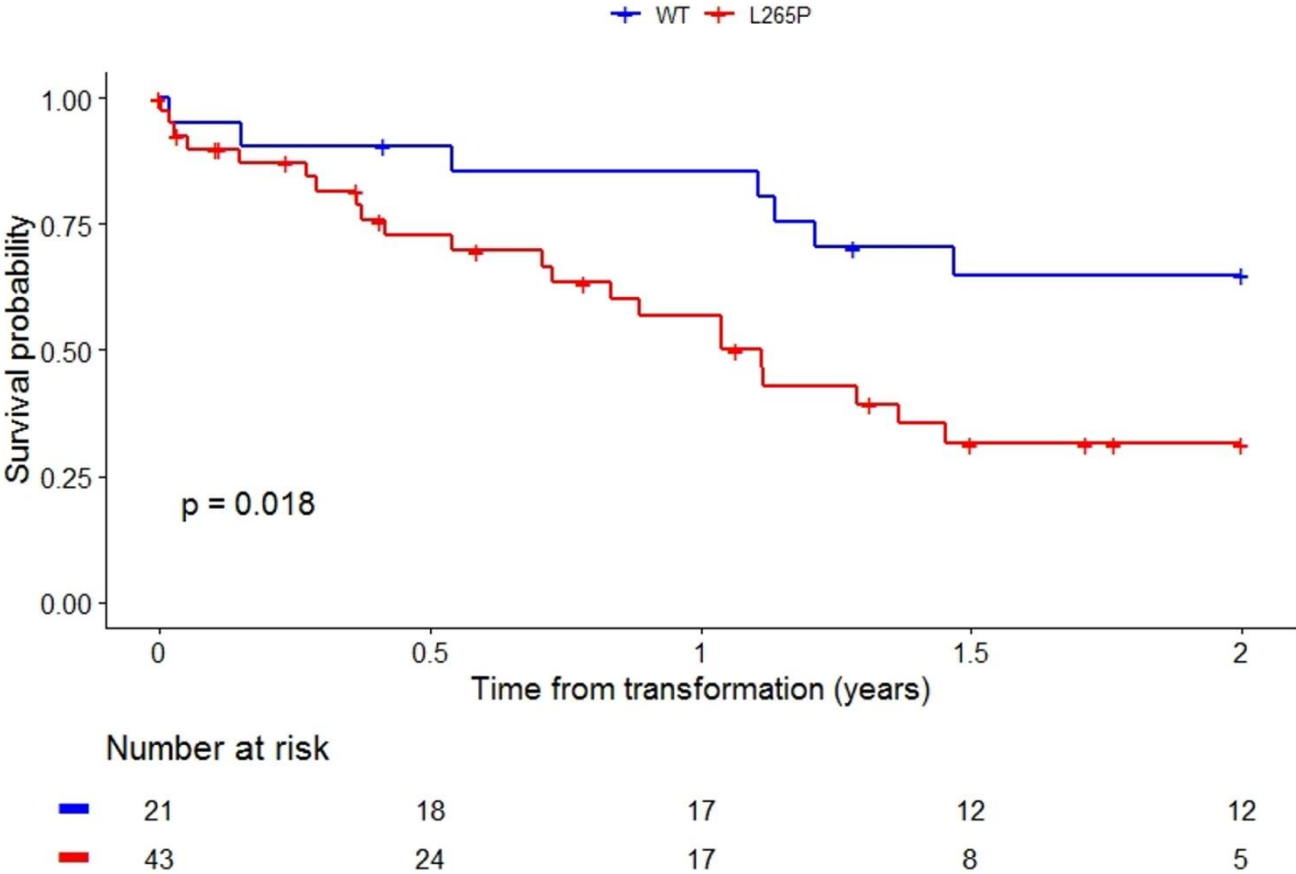

Supplement: 2020_262899_DUROT_SUPPL.pdf [file 2020_262899_DUROT_SUPPL.pdf]
